# Supplementary material for: Sequential Michael addition thiol–ene and radical-mediated thiol–ene reactions in one-pot produced sequence-ordered polymers
Source: Royal Society of Chemistry journal article supplement (doi:10.1039/c4py01363h), 2014-12-04
Supplement: c4py01363h1.pdf [file c4py01363h1.pdf]

Supporting information

## Sequential Michael Addition Thiol-Ene and Radical-Mediated Thiol-Ene Reactions in One-Pot Produce Sequence-Ordered Polymers

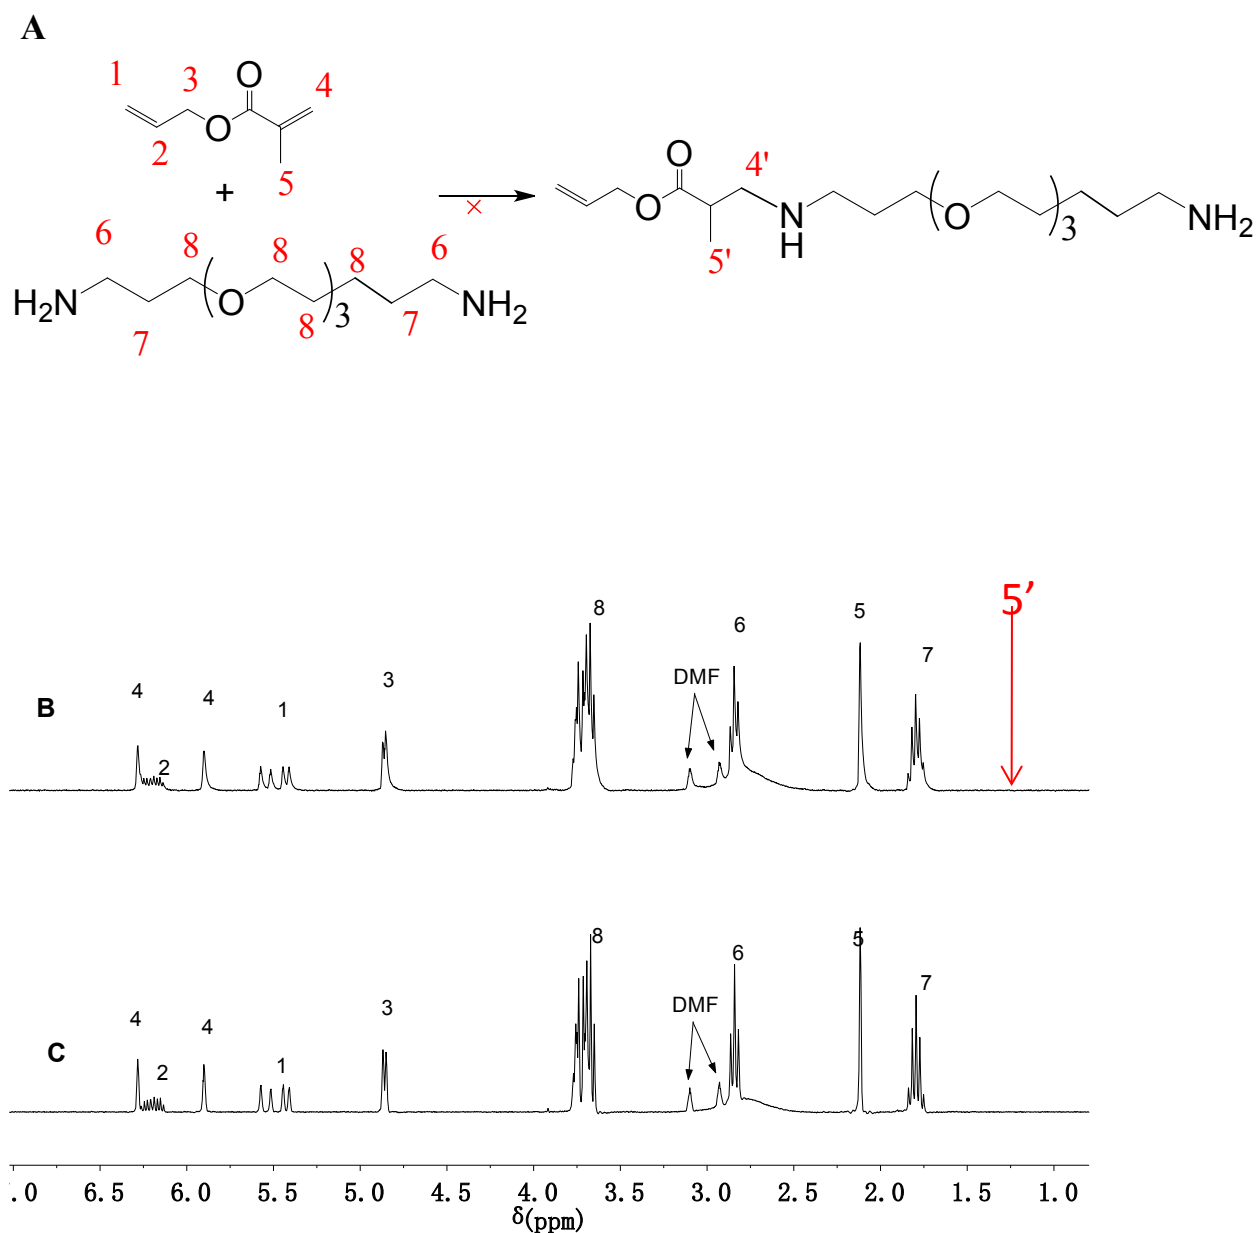

**Figure S1.** A. The reaction of allyl methacrylate and diamine. B.  $^1\text{H}$  NMR spectrum for the mixture of allyl methacrylate and diamine. C.  $^1\text{H}$  NMR

spectrum for the mixture of allyl methacrylate and diamine after being heated at 45 °C for 2 hrs. Solvent is DMF-*d*<sub>7</sub>.

**A**

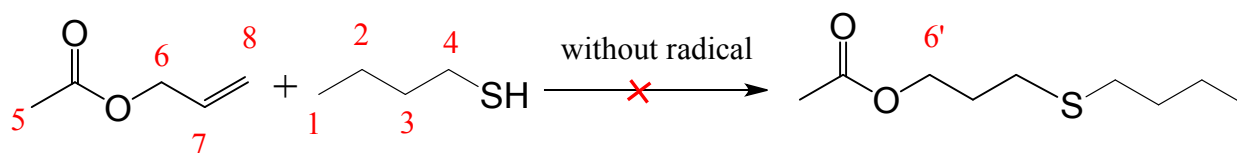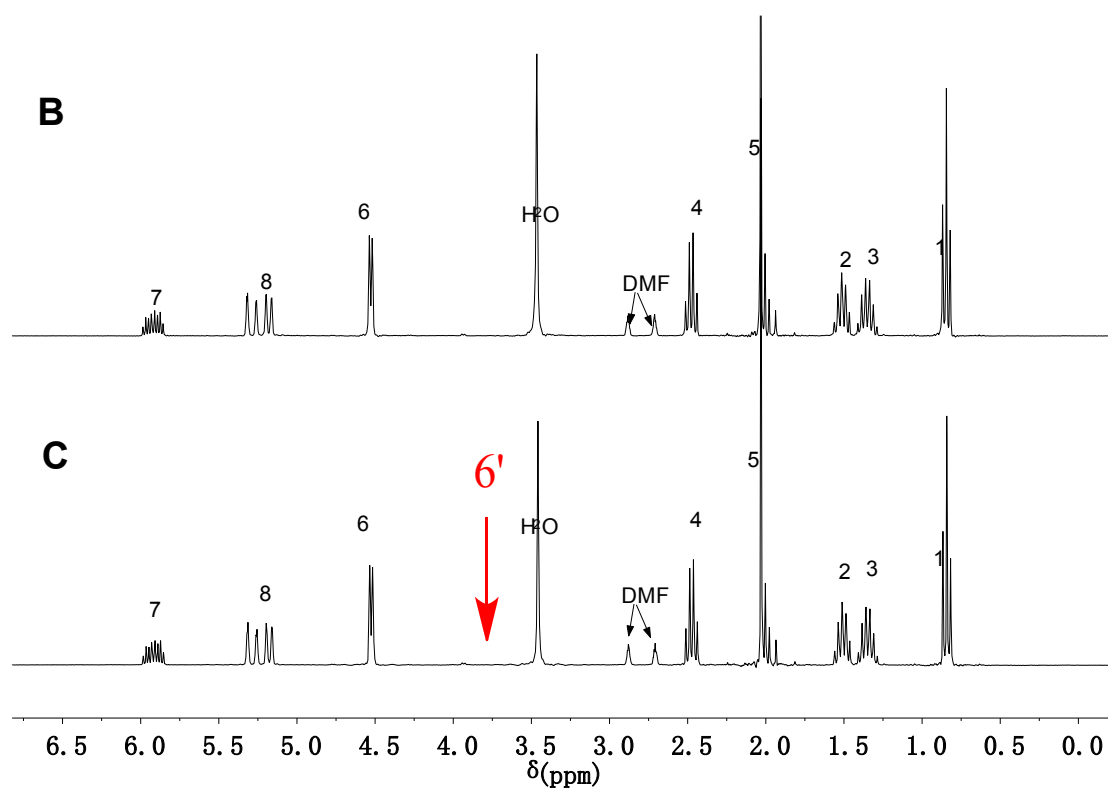

**Figure S2.** A. The reaction of allyl methacrylate and butane-1-thiol at molar ratio of 1:1 without free radical. B. <sup>1</sup>H NMR spectrum for the mixture of allyl methacrylate and butane-1-thiol without free radical. C. <sup>1</sup>H NMR spectrum for the mixture of allyl methacrylate and diamine butane-1-thiol without free radical after being heated at 45 °C for 2 hrs. Solvent is DMF-*d*<sub>7</sub>.

2014090\_HESI-1409SYL\_2#9 RT: 0.14 AV: 1 NL: 2.81E5  
T: FTMS + cESI Full ms [200.00-1000.00]

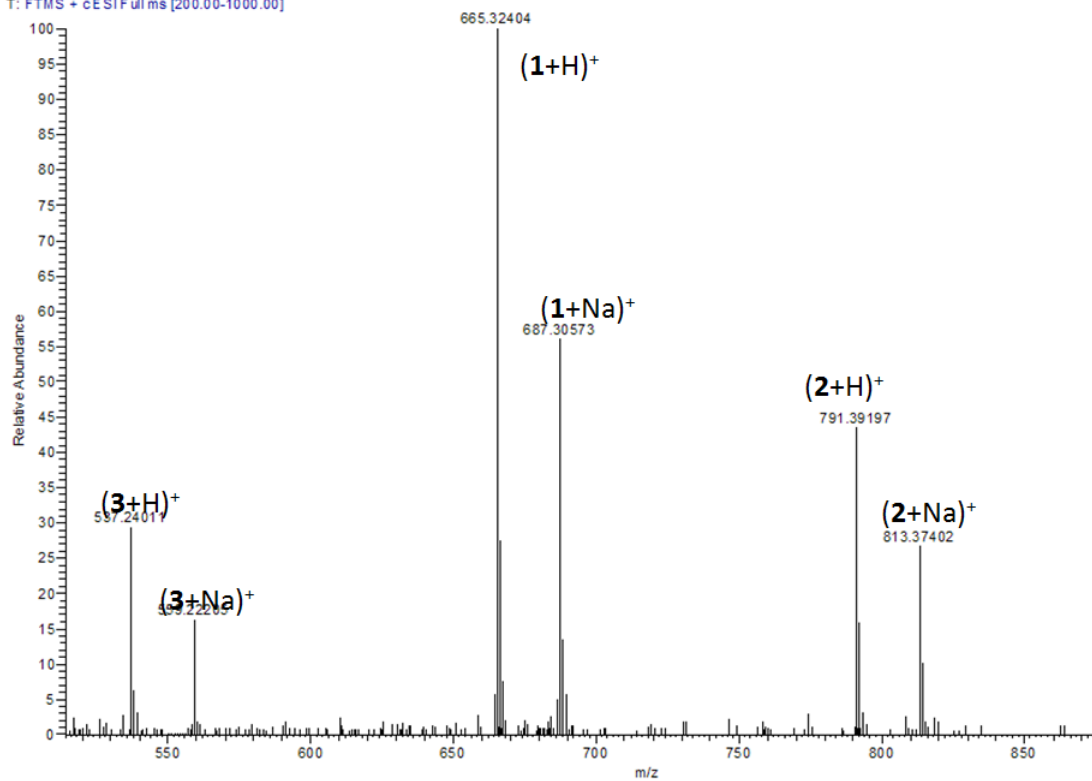

**Figure S3.** Mass spectrum for the intermediates of **1**, **2** and **3**.
